# Supplementary material for: Unambiguous Stereochemical Assignment of Cyclo(Phe-Pro), Cyclo(Leu-Pro), and Cyclo(Val-Pro) by Electronic Circular Dichroic Spectroscopy
Source: MDPI journal article supplement (doi:10.3390/molecules26195981), 2021-10-02
Supplement: s1 [file s1]

# Unambiguous stereochemical assignment of cyclo(Phe-Pro), cyclo(Leu-Pro), and cyclo(Val-Pro) by electronic circular dichroic spectroscopy

Alison Domzalski, Liliana Margent, Valeria Vigo, Faizunnahar Dewan, Nava Gara Kishore Pilarsetty, Yujia Xu, and Akira Kawamura

GNPS: Global Natural Products Social Molecular Networking

[MassIVE Datasets](#) | [Documentation](#) | [Forum](#) | [Contact](#)

Users:

Pass:

Sign in

Don't have an account? Register

Back to main page

Back to status page

Download

WG-time123-filtered\_default

Hits 1 - 21 out of 21

Go to

Go

Select columns

| Apply Filters                                          | ViewLib                                                       | Explore                                                                                                           | Compound_Name | ClusterIdx                       | View All Spectra | Library Class | Cosine | SharedPeaks | TIC Query | RT Query |
|--------------------------------------------------------|---------------------------------------------------------------|-------------------------------------------------------------------------------------------------------------------|---------------|----------------------------------|------------------|---------------|--------|-------------|-----------|----------|
| Filter By:                                             |                                                               |                                                                                                                   |               | -                                |                  |               | -      | -           | -         | -        |
| View Mirror Match  USI Links 1 <a href="#">ViewLib</a> | <a href="#">Explore Molecule in 0 Files and 0 Datasets</a>    | monolinolein                                                                                                      | 1855          | <a href="#">View Raw Spectra</a> | Bronze           | 0.79          | 6      | 6238.24     | 509.10    |          |
| View Mirror Match  USI Links 2 <a href="#">ViewLib</a> | <a href="#">Explore Molecule in 0 Files and 0 Datasets</a>    | eudesmin                                                                                                          | 2039          | <a href="#">View Raw Spectra</a> | Bronze           | 0.84          | 11     | 1944.26     | 663.69    |          |
| View Mirror Match  USI Links 3 <a href="#">ViewLib</a> | <a href="#">Explore Molecule in 433 Files and 20 Datasets</a> | cyclo(L-Val-L-Pro)                                                                                                | 396           | <a href="#">View Raw Spectra</a> | Bronze           | 0.85          | 6      | 19110.20    | 142.71    |          |
| View Mirror Match  USI Links 4 <a href="#">ViewLib</a> | <a href="#">Explore Molecule in 195 Files and 10 Datasets</a> | cyclo(L-Phe-D-Pro)                                                                                                | 711           | <a href="#">View Raw Spectra</a> | Bronze           | 0.83          | 7      | 23295.90    | 220.69    |          |
| View Mirror Match  USI Links 5 <a href="#">ViewLib</a> | <a href="#">Explore Molecule in 447 Files and 13 Datasets</a> | cyclo(L-Leu-L-Pro)                                                                                                | 413           | <a href="#">View Raw Spectra</a> | Bronze           | 0.71          | 8      | 41890.50    | 191.97    |          |
| View Mirror Match  USI Links 6 <a href="#">ViewLib</a> | <a href="#">Explore Molecule in 0 Files and 0 Datasets</a>    | [2,3-dihydroxy-1-(7-methoxy-2-oxochromen-6-yl)-3-methylbutyl] (Z)-2-methylbut-2-enoate                            | 2092          | <a href="#">View Raw Spectra</a> | Bronze           | 0.91          | 6      | 4734.26     | 584.63    |          |
| View Mirror Match  USI Links 7 <a href="#">ViewLib</a> | <a href="#">Explore Molecule in 0 Files and 0 Datasets</a>    | [(2R,3R,4R,5R)-2-(2,4-dioxypyrimidin-1-yl)-4-hydroxy-5-(hydroxymethyl)oxolan-3-yl] 2,4-dimethoxy-6-methylbenzoate | 2154          | <a href="#">View Raw Spectra</a> | Bronze           | 0.86          | 6      | 14595.00    | 398.26    |          |
| View Mirror Match  USI Links 8 <a href="#">ViewLib</a> | <a href="#">Explore Molecule in 0 Files and 0 Datasets</a>    | Spectral Match to Phthalic anhydride from NIST14                                                                  | 62            | <a href="#">View Raw Spectra</a> | Bronze           | 0.77          | 6      | 51887.30    | 496.79    |          |

**Figure S1.** GNPS analysis of metabolites in wheatgrass MMC. A LC/MS/MS dataset of wheatgrass MMC extract was submitted to GNPS, which identified a series of metabolites, including cyclo(L-Val-L-Pro), cyclo(L-Phe-D-Pro), and cyclo(L-Leu-L-Pro) as “Bronze” matches. These DKPs were also observed in the GNPS analyses of other MMCs (not shown).
